# Supplementary material for: Oceanic and atmospheric methane cycling in the cGENIE Earth system model – release v0.9.14
Source: Copernicus journal article supplement (doi:10.5194/gmd-13-5687-2020), 2020-11-20
Supplement: Supplementary file 1 [file gmd-13-5687-2020-supplement.zip]

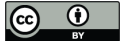

## *Supplement of*

# **Oceanic and atmospheric methane cycling in the cGENIE Earth system model – release v0.9.14**

**Christopher T. Reinhard et al.**

*Correspondence to:* Christopher T. Reinhard ([chris.reinhard@eas.gatech.edu](mailto:chris.reinhard@eas.gatech.edu))

- `gmd-13-5687-2020-supplement-title-page.pdf`
- `Reinhard.GMD.RateData.xlsx`
- `__MACOSX`
  - `._Reinhard.GMD.RateData.xlsx`

The copyright of individual parts of the supplement might differ from the CC BY 4.0 License.
